# Supplementary material for: Blood Leukocyte ROS Production Reflects Seminal Fluid Oxidative Stress and Spermatozoa Dysfunction in Idiopathic Infertile Men
Source: MDPI journal article supplement (doi:10.3390/antiox12020479), 2023-02-14
Supplement: s1 [file s1]

**Table S1.** Linear regression analyses between seminal (a) and systemic (b) oxidative stress parameters and sperm volume, total number, concentration and motility, among the 52 control subjects.

|                                                 | <b>Semen<br/>Volume</b>                                            | <b>Sperm total<br/>number</b>                                       | <b>Sperm<br/>concentration</b>                                     | <b>Progressive<br/>Sperm<br/>Motility (PSR)</b>                    |
|-------------------------------------------------|--------------------------------------------------------------------|---------------------------------------------------------------------|--------------------------------------------------------------------|--------------------------------------------------------------------|
| <b>(a) Seminal redox status</b>                 |                                                                    |                                                                     |                                                                    |                                                                    |
| Sperm ROS production (RFU)                      | F(1, 50): 1.20<br>Coef: -0.001 (-0.004, 0.001)<br>p-value: 0.279   | F(1, 50): 1.33<br>Coef: -0.105 (-0.286, +0.077)<br>p-value: 0.254   | F(1, 50): 0.12<br>Coef: -0.010 (-0.070, +0.050)<br>p-value: 0.732  | F(1, 50): 1.23<br>Coef: -0.012 (-0.034, +0.0109)<br>p-value: 0.273 |
| Seminal plasma lipid peroxidation (MDA nmol/ml) | F(1, 50): 0.80<br>Coef: -0.014 (-0.045, +0.017)<br>p-value: 0.375  | F(1, 50): 0.71<br>Coef: -0.876 (-2.957, +1.206)<br>p-value: 0.402   | F(1, 50): 0.01<br>Coef: +0.035 (-0.649, +0.719)<br>p-value: 0.919  | F(1, 50): 0.10<br>Coef: +0.040 (-0.214, +0.295)<br>p-value: 0.753  |
| Seminal plasma TAC (mM Trolox eq.)              | F(1, 50): 0.78<br>Coef: 0.017 (-0.022, 0.056)<br>p-value: 0.382    | F(1, 50): 0.37<br>Coef: +0.793 (-1.833, +3.419)<br>p-value: 0.547   | F(1, 50): 0.01<br>Coef: -0.040 (-0.900, +0.820)<br>p-value: 0.927  | F(1, 50): 0.23<br>Coef: -0.077 (-0.397, +0.243)<br>p-value: 0.630  |
| <b>(b) Systemic redox status</b>                |                                                                    |                                                                     |                                                                    |                                                                    |
| Lymphocyte ROS (RFU)                            | F(1, 50): 0.34<br>Coef: -0.001 (-0.001, +0.002)<br>p-value: 0.564  | F(1, 50): 0.16<br>Coef: -0.025 (-0.155, +0.104)<br>p-value: 0.695   | F(1, 50): 0.02<br>Coef: +0.003 (-0.040, +0.045)<br>p-value: 0.893  | F(1, 50): 0.22<br>Coef: -0.004 (-0.019, +0.012)<br>p-value: 0.641  |
| Monocyte ROS (RFU)                              | F(1, 50): 0.27<br>Coef: -0.000 (-0.001, +0.001)<br>p-value: 0.604  | F(1, 50): 0.00<br>Coef: -0.001 (-0.057, +0.058)<br>p-value: 0.978   | F(1, 50): 0.25<br>Coef: -0.005 (-0.014, +0.023)<br>p-value: 0.617  | F(1, 50): 1.00<br>Coef: -0.003 (-0.010, +0.003)<br>p-value: 0.322  |
| Granulocyte ROS (RFU)                           | F(1, 50): 0.72<br>Coef: -0.000 (-0.000, +0.001)<br>p-value: 0.399  | F(1, 50): 0.16<br>Coef: -0.011 (-0.066, +0.044)<br>p-value: 0.692   | F(1, 50): 0.05<br>Coef: -0.002 (-0.020, +0.016)<br>p-value: 0.822  | F(1, 50): 0.19<br>Coef: -0.001 (-0.008, +0.005)<br>p-value: 0.661  |
| Plasma lipid peroxidation (MDA nmol/ml)         | F(1, 50): 0.01<br>Coef: +0.237 (-0.4426, +0.474)<br>p-value: 0.916 | F(1, 50): 0.36<br>Coef: -9.003 (-39.258, +21.251)<br>p-value: 0.553 | F(1, 50): 2.00<br>Coef: -6.845 (-16.559, +2.869)<br>p-value: 0.163 | F(1, 50): 0.32<br>Coef: -1.032 (-4.771, +2.647)<br>p-value: 0.576  |
| Plasma Antioxidant Capacity (mM Trolox eq.)     | F(1, 50): 0.11<br>Coef: +0.016 (-0.080, +0.112)<br>p-value: 0.739  | F(1, 50): 3.30<br>Coef: +5.688 (-0.601, +11.977)<br>p-value: 0.075  | F(1, 50): 1.55<br>Coef: 1.294 (-0.793, +3.380)<br>p-value: 0.219   | F(1, 50): 0.62<br>Coef: -0.307 (-1.092, +0.477)<br>p-value: 0.435  |

**Table S2.** Multivariable regression analyses between seminal (a) and systemic (b) oxidative stress parameters and sperm volume, total number, concentration and motility, among the 34 infertile patients, considering in the model also age and smoking habit.

|                                                    | Semen<br>Volume                                    | Sperm total<br>number                             | Sperm concentration                               | Progressive<br>Sperm<br>Motility (PSR)            |
|----------------------------------------------------|----------------------------------------------------|---------------------------------------------------|---------------------------------------------------|---------------------------------------------------|
| <b>(a) Seminal redox status</b>                    |                                                    |                                                   |                                                   |                                                   |
| Sperm ROS production<br>(RFU)                      | F(3, 30): 4.75<br>Coeff: -0.005<br>p-value: 0.014* | F(3, 30): 1.63<br>Coeff: 0.006<br>p-value: 0.706  | F(3, 30): 0.70<br>Coeff: 0.004<br>p-value: 0.446  | F(3,30): 0.22<br>Coeff: 0.004<br>p-value: 0.859   |
| Seminal plasma lipid peroxidation (MDA<br>nmol/ml) | F(3, 30): 2.55<br>Coeff: -0.022<br>p-value: 0.248  | F(3, 30): 2.06<br>Coeff: -0.142<br>p-value: 0.269 | F(3, 30): 0.51<br>Coeff: -0.009<br>p-value: 0.839 | F(3,30): 0.28<br>Coeff: 0.088<br>p-value: 0.656   |
| Seminal plasma TAC<br>(mM Trolox eq.)              | F(3, 30): 2.26<br>Coeff: -0.021<br>p-value: 0.424  | F(3, 30): 2.19<br>Coeff: -0.212<br>p-value: 0.214 | F(3, 30): 0.74<br>Coeff: -0.051<br>p-value: 0.405 | F(3, 30): 0.22<br>Coeff: 0.046<br>p-value: 0.862  |
| <b>(b) Systemic redox status</b>                   |                                                    |                                                   |                                                   |                                                   |
| Lymphocyte ROS (RFU)                               | F(3, 30): 7.48<br>Coeff: -0.003<br>p-value: 0.001* | F(3, 30): 1.64<br>Coeff: -0.002<br>p-value: 0.666 | F(3, 30): 0.87<br>Coeff: 0.002<br>p-value: 0.308  | F(3, 30): 0.22<br>Coeff: 0.002<br>p-value: 0.837  |
| Monocyte ROS (RFU)                                 | F(3, 30): 5.36<br>Coeff: -0.001<br>p-value: 0.007* | F(3, 30): 1.58<br>Coeff: 0.000<br>p-value: 0.900  | F(3, 30): 0.98<br>Coeff: 0.001<br>p-value: 0.250  | F(3, 30): 0.37<br>Coeff: -0.004<br>p-value: 0.494 |
| Granulocyte ROS (RFU)                              | F(3, 30): 6.26<br>Coeff: -0.001<br>p-value: 0.003* | F(3, 30): 1.58<br>Coeff: 0.000<br>p-value: 0.915  | F(3, 30): 1.62<br>Coeff: 0.001<br>p-value: 0.083  | F(3, 30): 0.35<br>Coeff: -0.002<br>p-value: 0.530 |
| Plasma lipid peroxidation (MDA nmol/ml)            | F(3, 30): 2.16<br>Coeff: -0.150<br>p-value: 0.531  | F(3, 30): 5.18<br>Coeff: -4.26<br>p-value: 0.005* | F(3, 30): 2.43<br>Coeff: -1.24<br>p-value: 0.025* | F(3, 30): 0.61<br>Coeff: -2.60<br>p-value: 0.285  |
| Plasma Antioxidant Capacity (mM Trolox<br>eq.)     | F(3, 30): 2.00<br>Coeff: 0.009<br>p-value: 0.912   | F(3, 30): 2.86<br>Coeff: -0.929<br>p-value: 0.078 | F(3, 30): 1.53<br>Coeff: -0.316<br>p-value: 0.095 | F(3, 30): 0.34<br>Coeff: -0.504<br>p-value: 0.539 |

*F(3,30) values are for the entire models, with the three dependent variables (oxidative stress parameters, age and smoking habit). Coefficients and p-values refer to the considered parameters, when adding to the model also age and smoking habit.*

\*statistically significant for  $p < 0.05$
